# Supplementary material for: A benzimidazole-based ‘turn-on’ fluorescent probe for highly sensitive detection of Fe3+/2+: synthesis, performance, DFT calculations and applications
Source: Royal Society of Chemistry journal article supplement (doi:10.1039/d4tc00080c), 2024-01-01
Supplement: d4tc00080c1.pdf [file d4tc00080c1.pdf]

## Supporting Information for

# A benzimidazole-based ‘turn-on’ fluorescent probe for highly sensitive detection of Fe<sup>3+/2+</sup>: synthesis, performance, DFT calculations and applications

Ning Duan, Leyuan Ding, Shaoxiang Yang\*, Hongyu Tian and Baoguo Sun

*Beijing Key laboratory of Flavor Chemistry, Beijing Technology and Business University, Beijing 100048, PR China*

\* Corresponding author. E-mail: [yangshaoxiang@th.btbu.edu.cn](mailto:yangshaoxiang@th.btbu.edu.cn) (S. X. Yang)

| TABLE OF CONTENTS                                                                                                                                                                                                                                                                                                                                                                                                                                                                                                          | PAGE |
|----------------------------------------------------------------------------------------------------------------------------------------------------------------------------------------------------------------------------------------------------------------------------------------------------------------------------------------------------------------------------------------------------------------------------------------------------------------------------------------------------------------------------|------|
| <b>Fig. S1.</b> <sup>1</sup> H NMR spectra of compound 3                                                                                                                                                                                                                                                                                                                                                                                                                                                                   | 2    |
| <b>Fig. S2.</b> <sup>13</sup> C NMR spectra of compound 3                                                                                                                                                                                                                                                                                                                                                                                                                                                                  | 2    |
| <b>Fig. S3.</b> HRMS spectra of compound 3                                                                                                                                                                                                                                                                                                                                                                                                                                                                                 | 3    |
| <b>Fig. S4.</b> <sup>1</sup> H NMR spectra of probe FBBAP                                                                                                                                                                                                                                                                                                                                                                                                                                                                  | 3    |
| <b>Fig. S5.</b> <sup>13</sup> C NMR spectra of probe FBBAP                                                                                                                                                                                                                                                                                                                                                                                                                                                                 | 4    |
| <b>Fig. S6.</b> HRMS spectra of probe FBBAP                                                                                                                                                                                                                                                                                                                                                                                                                                                                                | 4    |
| <b>Fig. S7.</b> (A) Fluorescence spectra of probe FBBAP (10 μM) with Fe <sup>3+/2+</sup> (0.4 μM) in different solvents; (B) The emission wavelength changes of the probe under different ratios of ethanol. (C) The linear relationship between the emission wavelength of probe FBBAP and different proportions of ethanol. Insert: The luminescence of probe FBBAP under different ratios of ethanol. (D) Fluorescence spectra of probe FBBAP (10 μM) with Fe <sup>3+/2+</sup> (0.4 μM) in different ratios of ethanol. | 5    |
| <b>Fig. S8.</b> (a) Absorption spectrum of probe FBBAP (10 μM) with Fe <sup>3+/2+</sup> (0-55 μM) in EtOH at 25°C. (b) Plot of fluorescence intensity with 0-40 μM Fe <sup>3+/2+</sup> . Tests were performed in triplicate.                                                                                                                                                                                                                                                                                               | 5    |
| <b>Fig. S9.</b> The UV (a) and fluorescence spectra (b) of probe FBBAP and compound 3.                                                                                                                                                                                                                                                                                                                                                                                                                                     | 6    |
| <b>Fig. S10.</b> (a) The variation of fluorescence intensity of probe FBBAP with time after adding Fe <sup>3+/2+</sup> . (b) Changes in probe FBBAP at 365nm after adding different concentrations of Fe <sup>3+/2+</sup> .                                                                                                                                                                                                                                                                                                | 6    |
| <b>Fig. S11.</b> The NMR mechanism diagram of the probe FBBAP after adding different concentrations of Fe <sup>3+/2+</sup> .                                                                                                                                                                                                                                                                                                                                                                                               | 7    |
| <b>Fig. S12.</b> High performance liquid chromatography of probe FBBAP, compound 3, and FBBAP+Fe <sup>3+/2+</sup> (50 μM).                                                                                                                                                                                                                                                                                                                                                                                                 | 7    |
| <b>Fig. S13.</b> The experimental results of HPLC-MS after probe FBBAP response to Fe <sup>3+/2+</sup> .                                                                                                                                                                                                                                                                                                                                                                                                                   | 8    |
| <b>Table S1</b> Calculation Results of Excited States of Probes and Intermediates by Three Functional Methods. EtOH was used as the solvent (PCM model).                                                                                                                                                                                                                                                                                                                                                                   | 9    |
| <b>Table S2</b> Determination of total iron content in really sample                                                                                                                                                                                                                                                                                                                                                                                                                                                       | 9    |

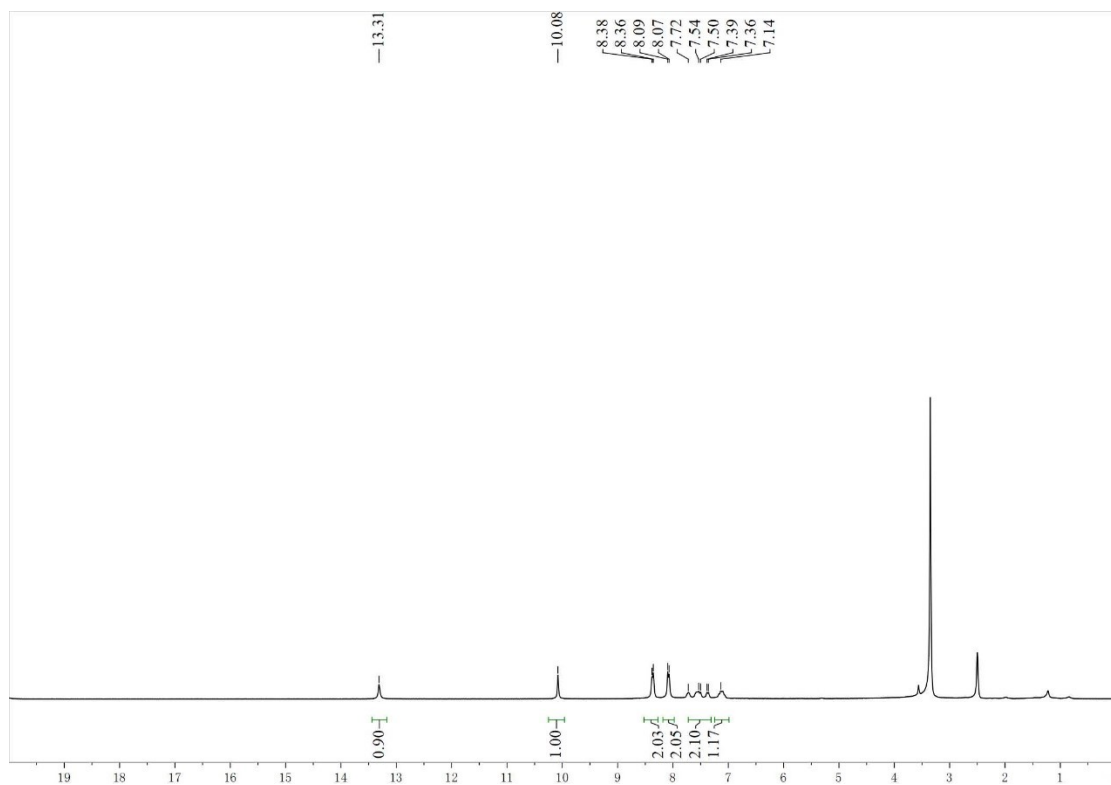

**Fig. S1.**  $^1\text{H}$  NMR spectra of compound 3

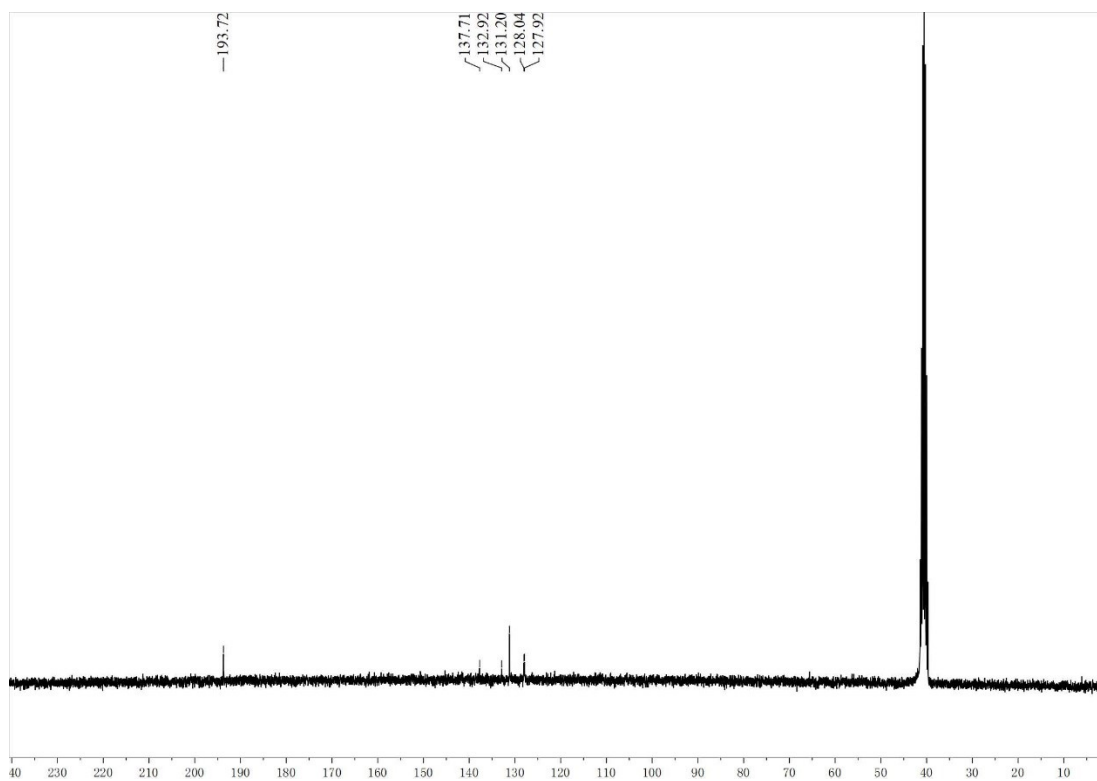

**Fig. S2.**  $^{13}\text{C}$  NMR spectra of compound 3

## Single Mass Analysis

Tolerance = 20.0 PPM / DBE: min = -1.5, max = 50.0

Element prediction: Off

Number of isotope peaks used for i-FIT = 3

Monoisotopic Mass, Even Electron Ions

211 formula(e) evaluated with 1 results within limits (up to 50 closest results for each mass)

Elements Used:

C: 14-14 H: 10-10 N: 0-100 O: 0-100 Na: 0-1 F: 1-1

14

230818-5-C-DN-M2 26 (0.256)

1: TOF MS ES+  
1.70e+003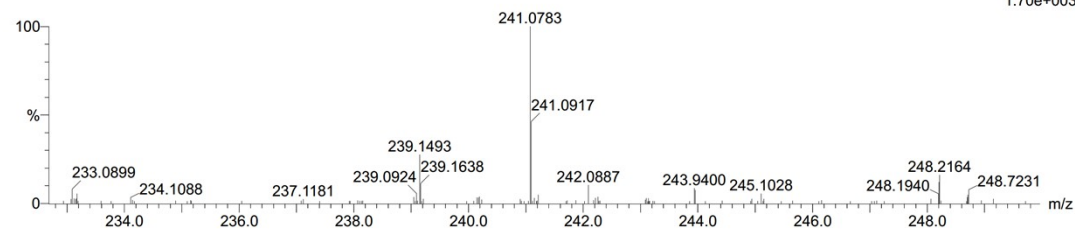Minimum: -1.5  
Maximum: 5.0 20.0 50.0

| Mass     | Calc. Mass | mDa | PPM | DBE  | i-FIT | Norm | Conf (%) | Formula        |
|----------|------------|-----|-----|------|-------|------|----------|----------------|
| 241.0783 | 241.0777   | 0.6 | 2.5 | 10.5 | 172.4 | n/a  | n/a      | C14 H10 N2 O F |

Fig. S3. HRMS spectra of compound 3

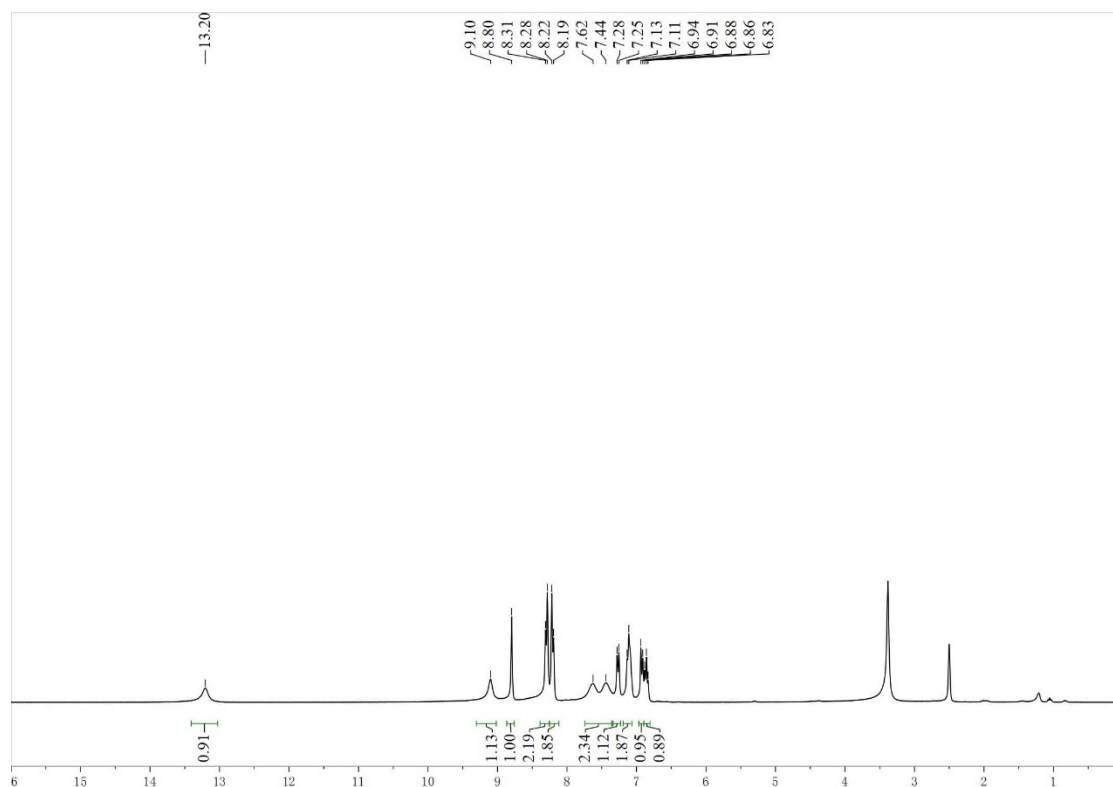Fig. S4. <sup>1</sup>H NMR spectra of probe FBBAP

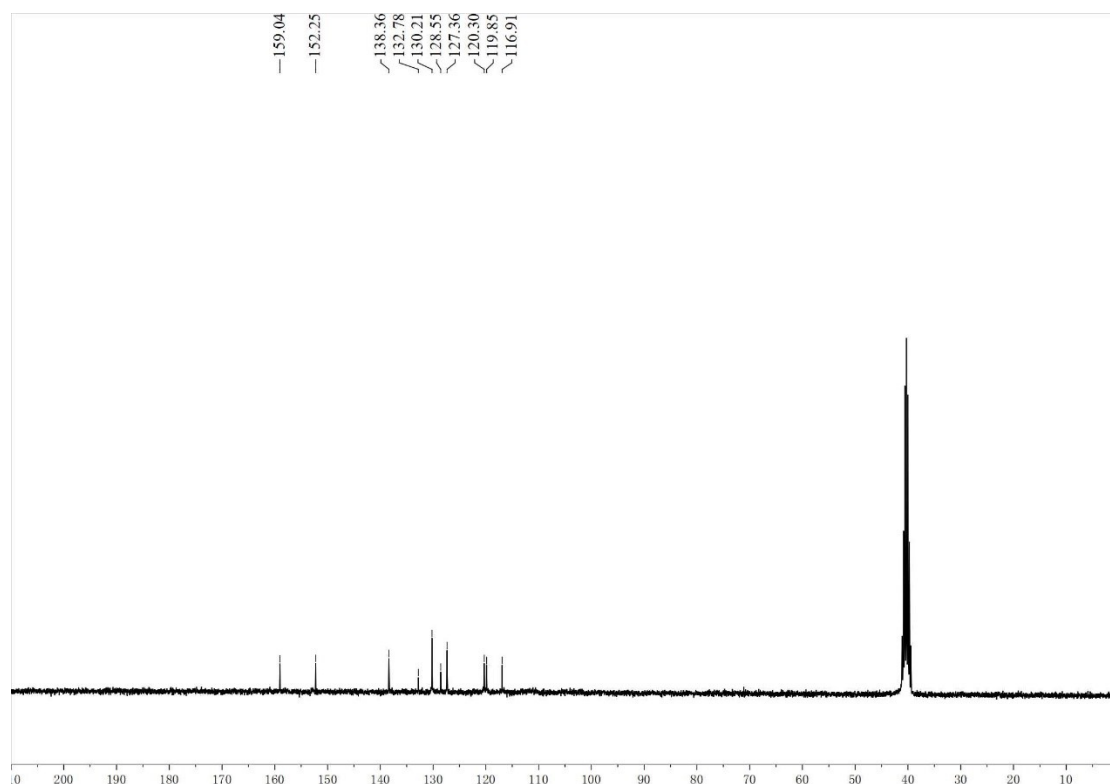

**Fig. S5.**  $^{13}\text{C}$  NMR spectra of probe FBBAP

### Elemental Composition Report

Page 1

#### Single Mass Analysis

Tolerance = 20.0 PPM / DBE: min = -1.5, max = 50.0

Element prediction: Off

Number of isotope peaks used for i-FIT = 3

Monoisotopic Mass, Even Electron Ions

420 formula(e) evaluated with 1 results within limits (up to 50 closest results for each mass)

Elements Used:

C: 20-20 H: 15-15 N: 0-100 O: 0-100 Na: 0-1 F: 1-1

14

230818-5-C-DN-P2 14 (0.145)

1: TOF MS ES+  
1.27e+004

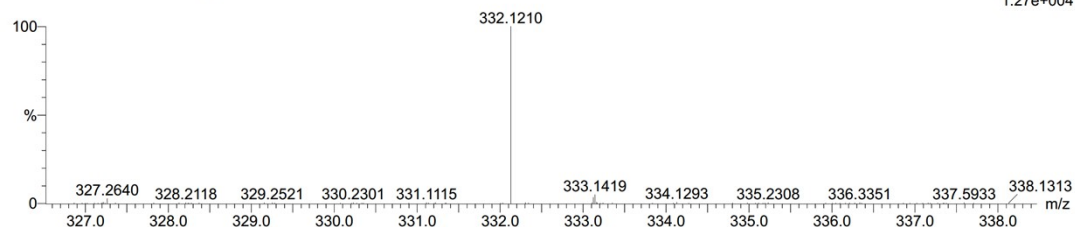

Minimum: -1.5  
Maximum: 5.0 20.0 50.0

| Mass     | Calc. Mass | mDa | PPM | DBE  | i-FIT | Norm | Conf (%) | Formula                                            |
|----------|------------|-----|-----|------|-------|------|----------|----------------------------------------------------|
| 332.1210 | 332.1199   | 1.1 | 3.3 | 14.5 | 117.7 | n/a  | n/a      | C <sub>20</sub> H <sub>15</sub> N <sub>3</sub> O F |

**Fig. S6.** HRMS spectra of probe FBBAP

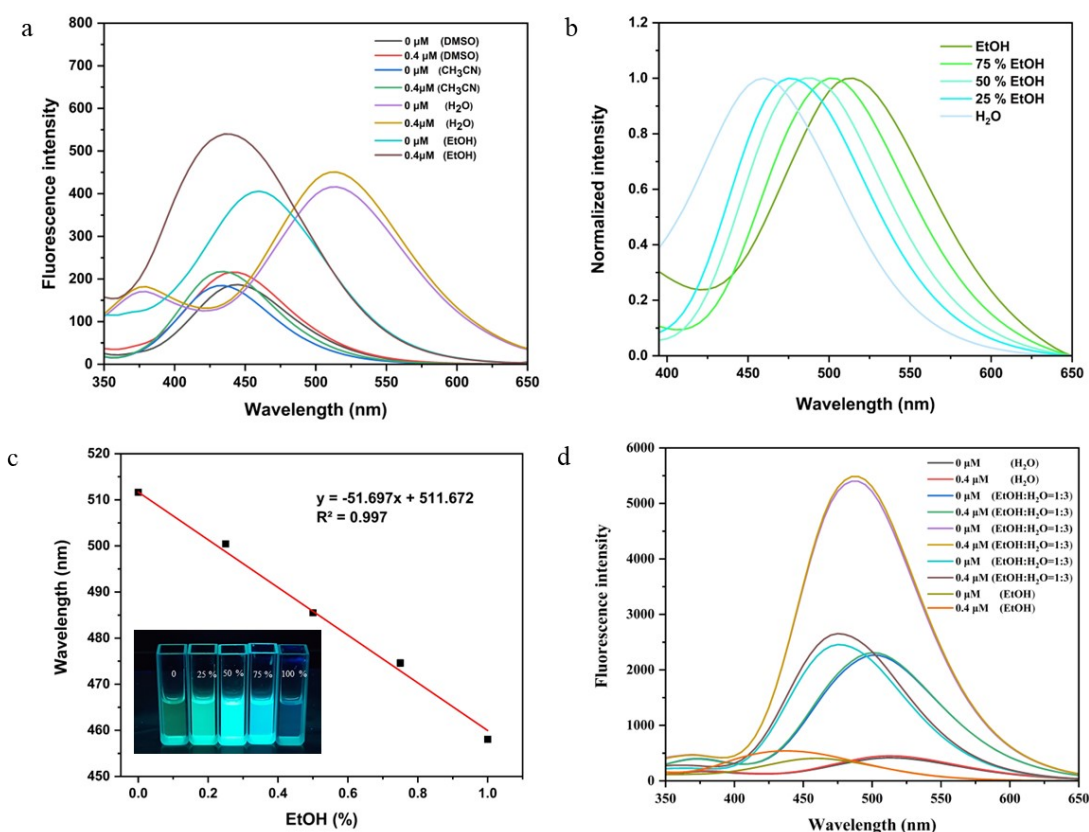

**Fig. S7.** (a) Fluorescence spectra of probe FBBAP (10  $\mu\text{M}$ ) with  $\text{Fe}^{3+/2+}$  (0.4  $\mu\text{M}$ ) in different solvents; (b) The emission wavelength changes of the probe under different ratios of ethanol. (c) The linear relationship between the emission wavelength of probe FBBAP and different proportions of ethanol. Insert: The luminescence of probe FBBAP under different ratios of ethanol. (d) Fluorescence spectra of probe FBBAP (10  $\mu\text{M}$ ) with  $\text{Fe}^{3+/2+}$  (0.4  $\mu\text{M}$ ) in different ratios of ethanol.

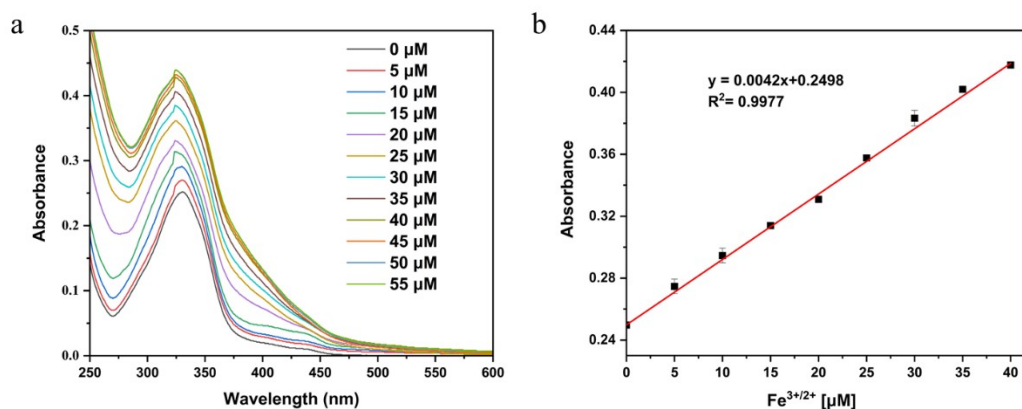

**Fig. S8.** (a) Absorption spectrum of probe FBBAP (10  $\mu\text{M}$ ) with  $\text{Fe}^{3+/2+}$  (0-55  $\mu\text{M}$ ) in EtOH at 25°C. (b) Plot of fluorescence intensity with 0-40  $\mu\text{M}$   $\text{Fe}^{3+/2+}$ . Tests were performed in triplicate.

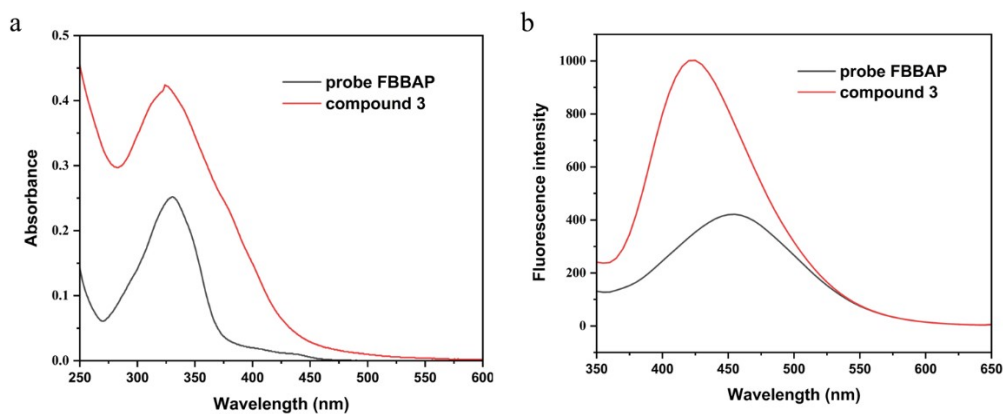

**Fig. S9.** The UV (a) and fluorescence spectra (b) of probe FBBAP and compound 3.

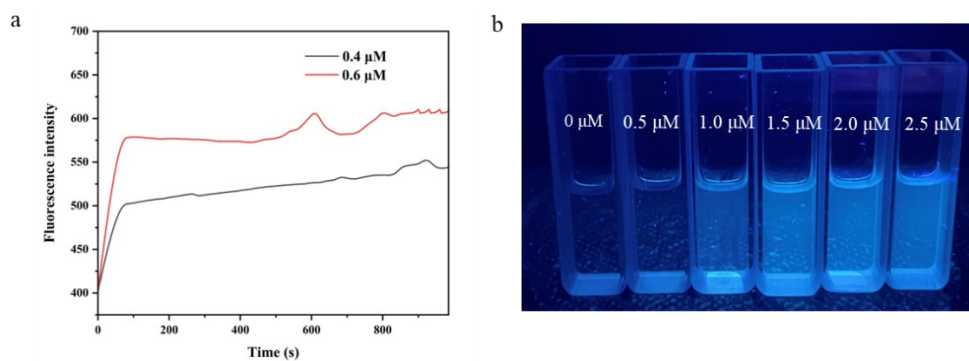

**Fig. S10.** (a) The variation of fluorescence intensity of probe FBBAP with time after adding  $\text{Fe}^{3+/2+}$ . (b) Changes in probe FBBAP at 365nm after adding different concentrations of  $\text{Fe}^{3+/2+}$ .

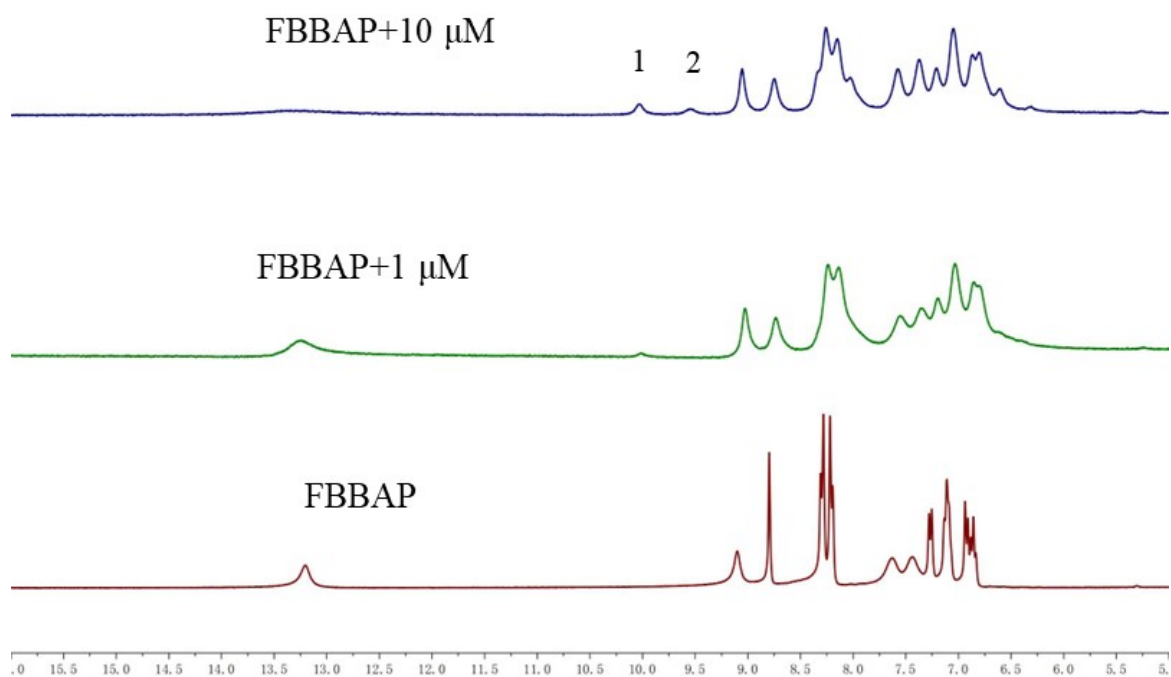

**Fig. S11.** The NMR mechanism diagram of the probe FBBAP after adding different concentrations of  $\text{Fe}^{3+/2+}$ .

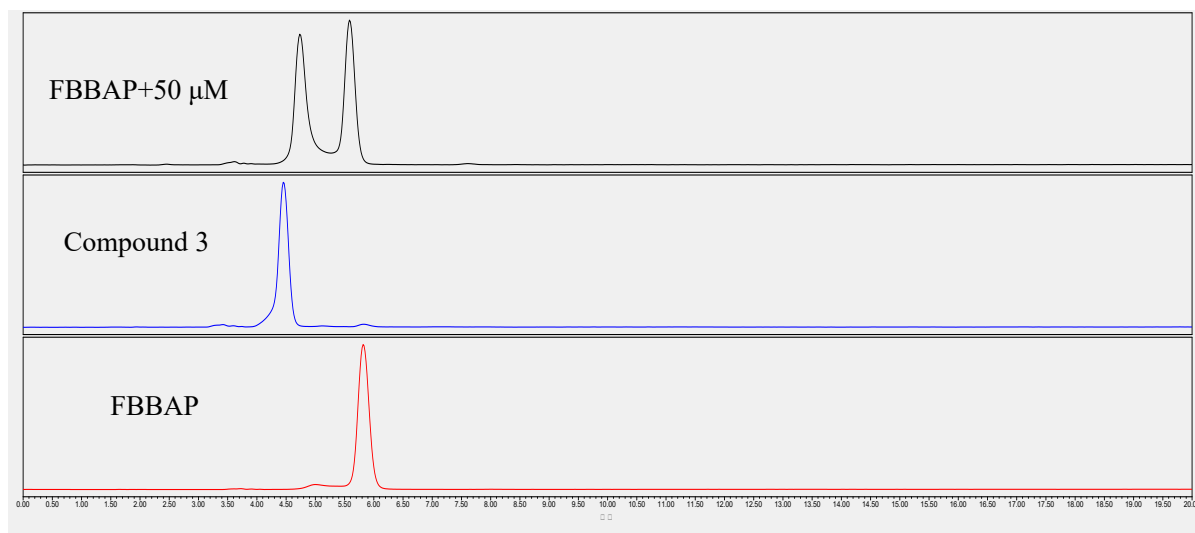

**Fig. S12.** High performance liquid chromatography of probe FBBAP, compound 3, and FBBAP+ $\text{Fe}^{3+/2+}$  (50 μM).

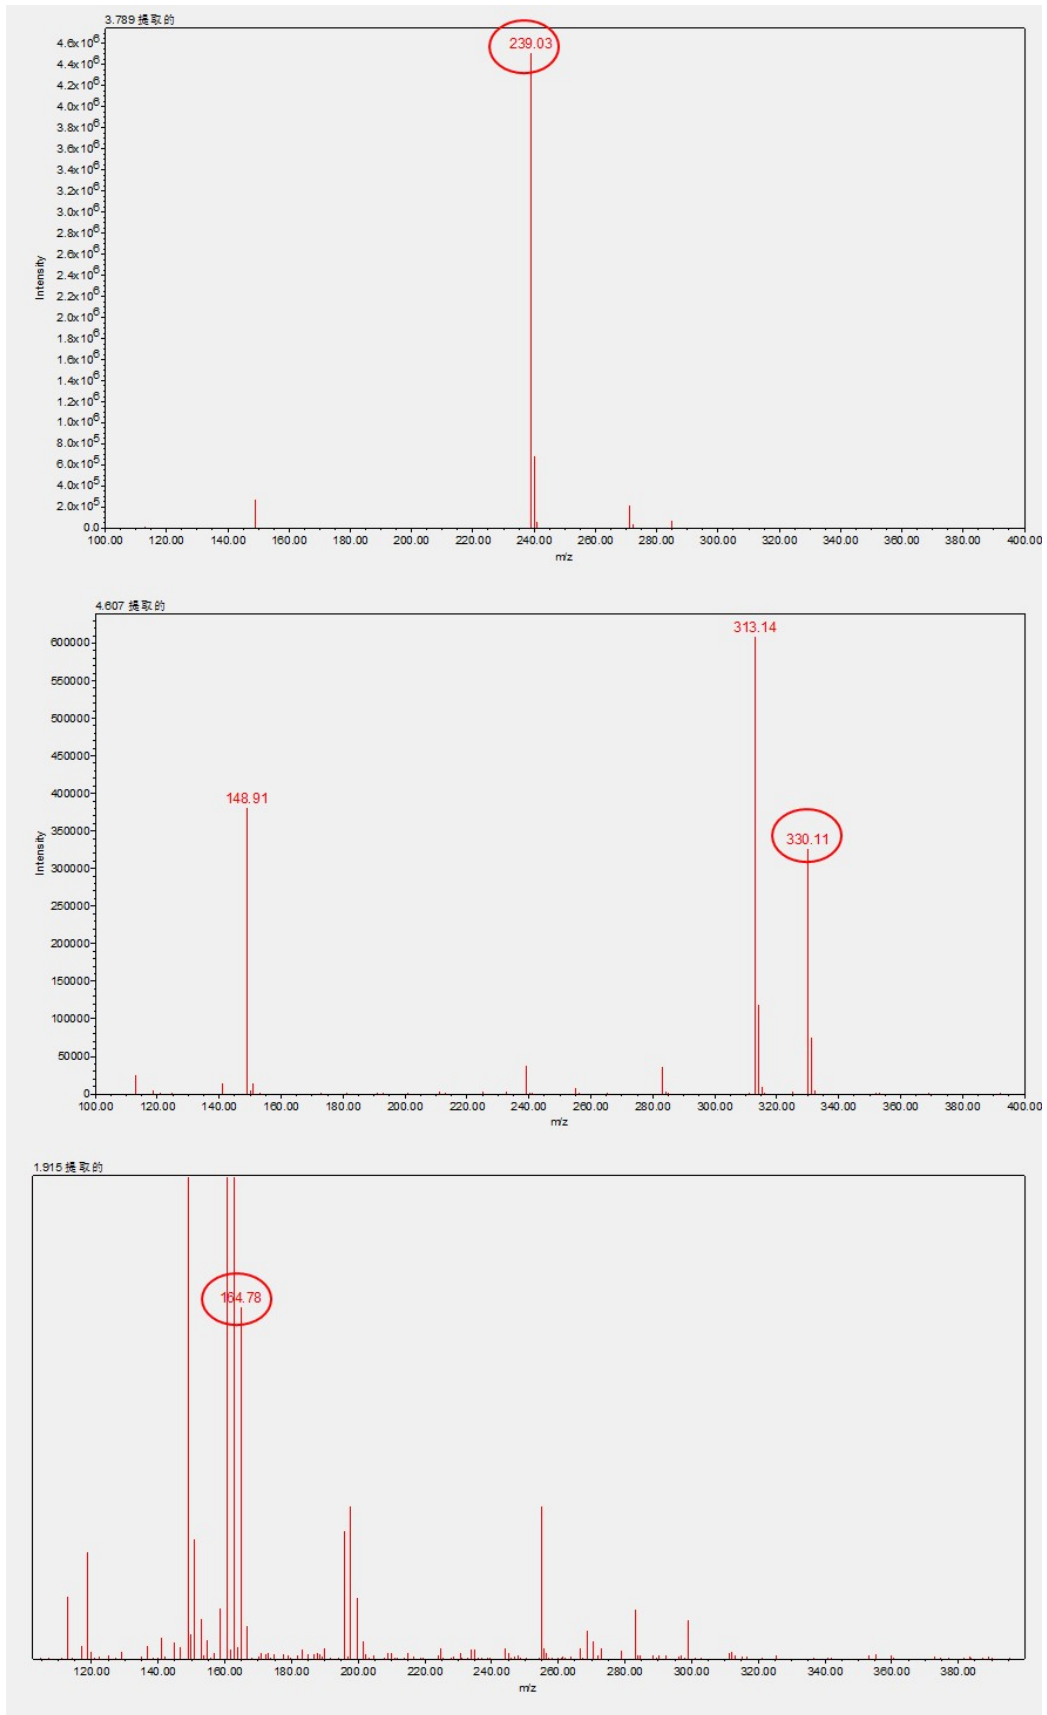

Fig. S13. The experimental results of HPLC-MS after probe FBBAP response to Fe<sup>3+/2+</sup>.



**Table S1** Calculation Results of Excited States of Probes and Intermediates by Three Functional Methods. EtOH was used as the solvent (PCM model).

| Functionals |                             | Cam-B3LYP | M06-2X | PBE0   | Experimental value |
|-------------|-----------------------------|-----------|--------|--------|--------------------|
| Compound 3  | $\lambda_{\text{abs}}$ (nm) | 321.28    | 336.50 | 345.57 | 330                |
|             | CI coefficient              | 0.61      | 0.57   | 0.70   | /                  |
|             | $\lambda_{\text{em}}$ (nm)  | 425.59    | 367.99 | 434.16 | 420                |
|             | CI coefficient              | 0.71      | 0.70   | 0.70   | /                  |
| Probe FBBAP | f                           | 1.3126    | 1.2505 | 1.4414 | /                  |
|             | $\lambda_{\text{abs}}$ (nm) | 355.61    | 344.39 | 394.33 | 349                |
|             | CI coefficient              | 0.69      | 0.67   | 0.70   | /                  |
|             | $\lambda_{\text{em}}$ (nm)  | 469.32    | 382.83 | 471.91 | 460                |
|             | CI coefficient              | 0.68      | 0.63   | 0.67   | /                  |
|             | f                           | 0.0130    | 0.0767 | 0.0330 | /                  |

**Table S2** Determination of total iron content in really samples

| Sample     | Fe <sup>3+</sup> level found ( $\mu\text{M}$ ) | Added ( $\mu\text{M}$ ) | Found ( $\mu\text{M}$ ) | Recovery/% | RSD/(n=3) |
|------------|------------------------------------------------|-------------------------|-------------------------|------------|-----------|
| Red wine 1 | 0.34                                           | 0.2                     | 0.54                    | 103.40     | 0.01      |
|            |                                                | 0.4                     | 0.72                    | 95.33      | 0.02      |
| Red wine 2 | 0.46                                           | 0.2                     | 0.66                    | 95.63      | 0.02      |
|            |                                                | 0.4                     | 0.86                    | 99.23      | 0.09      |
| Water      | 0.00                                           | 0.2                     | 0.20                    | 98.12      | 0.28      |
|            |                                                | 0.4                     | 0.39                    | 98.04      | 0.29      |
| Milk 1     | 0.00                                           | 0.2                     | 0.19                    | 96.83      | 0.55      |
|            |                                                | 0.4                     | 0.42                    | 106.02     | 0.12      |
| Milk 2     | 0.00                                           | 0.2                     | 0.19                    | 96.53      | 0.62      |
|            |                                                | 0.4                     | 0.40                    | 101.11     | 0.48      |
